# Supplementary material for: Cost-effectiveness of nivolumab plus ipilimumab as first-line treatment for American patients with unresectable malignant pleural mesothelioma
Source: PubMed Central journal article supplement (PMC9354521; doi:10.3389/fpubh.2022.947375), 2022-07-22
Supplement: Data_Sheet_1.pdf [file Data_Sheet_1.pdf]

## Supplementary Material

eFigure1: Markov state transition probability diagram.

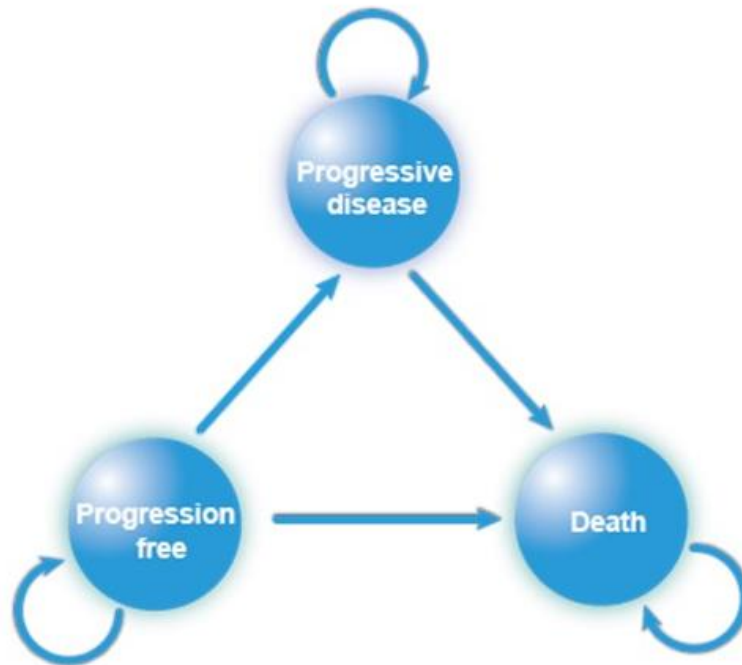

eFigure2: Fitting and extrapolation of Kaplan Meier survival curve for PFS.

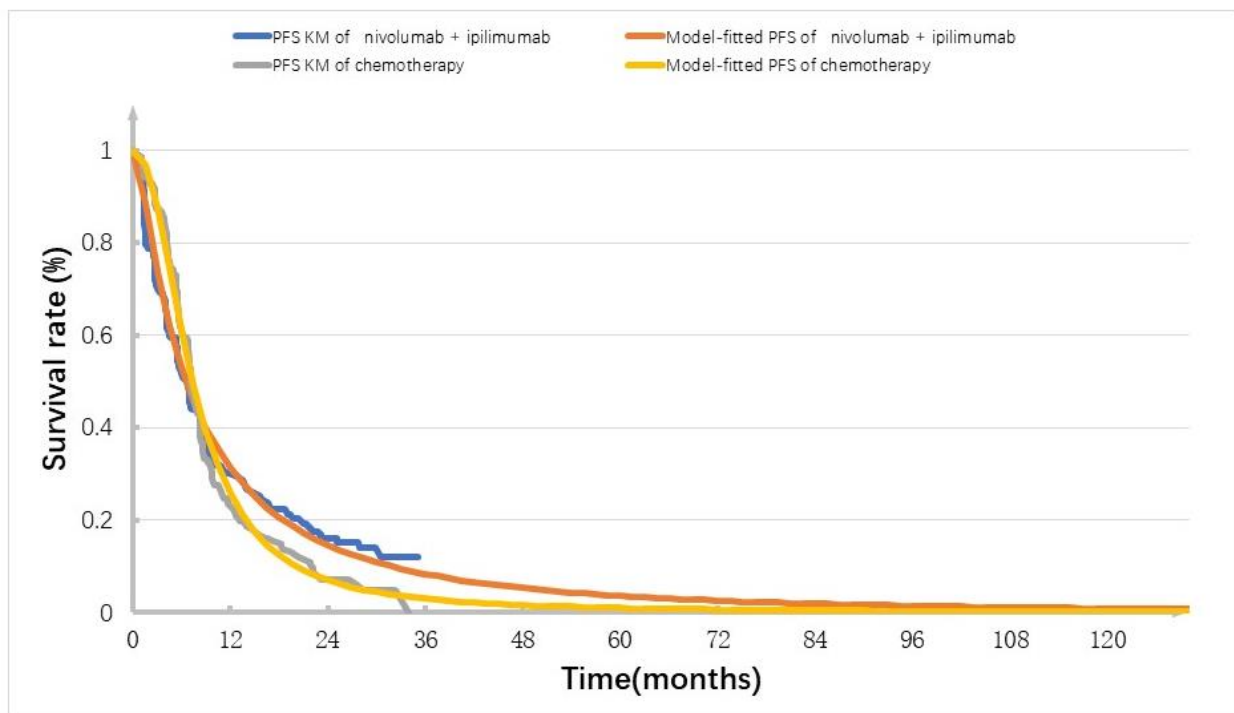

eFigure3. Fitting and extrapolation of Kaplan Meier survival curve for OS.

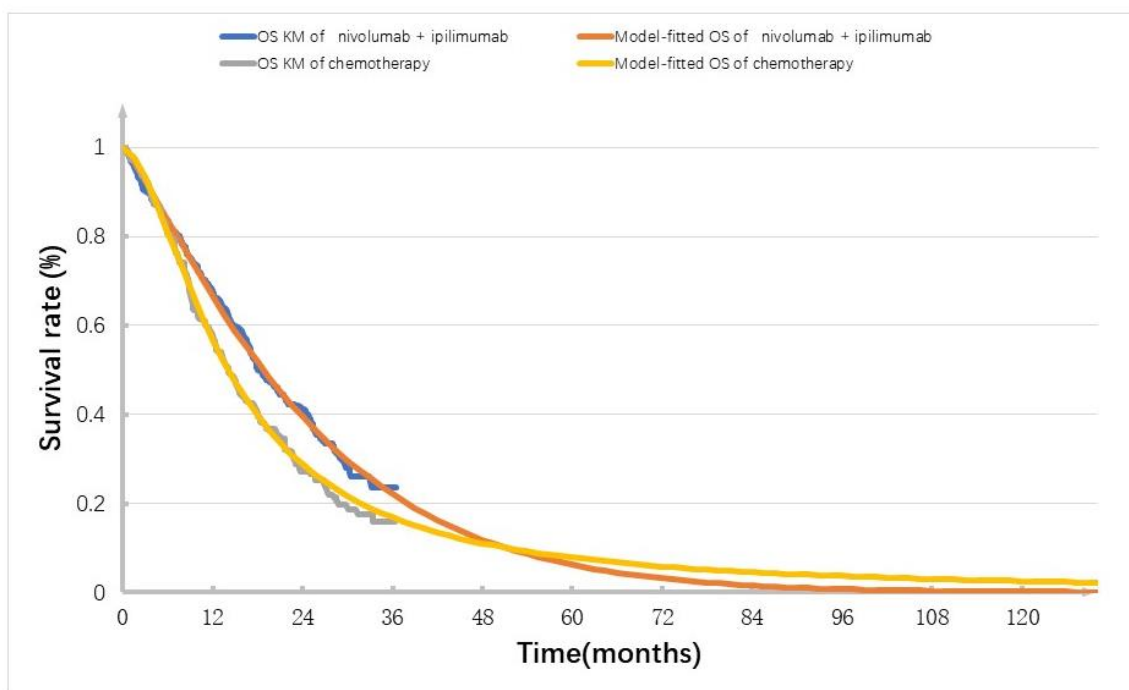

eTable1.AIC and BIC scores of fitted distribution.

Table1.AIC and BIC scores of fitted distribution in all patients from CheckMate 743

| Distribution        | OS of Nivolumab plus ipilimumab |          | OS of chemotherapy |          | PFS of Nivolumab plus ipilimumab |          | PFS of chemotherapy |          |
|---------------------|---------------------------------|----------|--------------------|----------|----------------------------------|----------|---------------------|----------|
|                     | AIC                             | BIC      | AIC                | BIC      | AIC                              | BIC      | AIC                 | BIC      |
| <b>All patients</b> |                                 |          |                    |          |                                  |          |                     |          |
| Exponential         | 1710.463                        | 1714.177 | 1742.953           | 1746.663 | 1501.429                         | 1505.143 | 1422.707            | 1426.417 |
| Gamma               | 1705.247                        | 1712.674 | 1725.998           | 1733.419 | 1503.42                          | 1510.847 | 1378.44             | 1385.861 |
| Gompertz            | 1705.421                        | 1712.848 | 1736.642           | 1744.062 | 1488.072                         | 1495.499 | 1376.032            | 1387.164 |
| Weibull             | 1704.805                        | 1712.232 | 1727.364           | 1734.785 | 1502.113                         | 1509.541 | 1415.815            | 1423.235 |
| Log-logistic        | 1712.594                        | 1720.021 | 1725.553           | 1732.974 | 1472.127                         | 1479.554 | 1388.451            | 1395.872 |
| Log-normal          | 1720.415                        | 1727.843 | 1737.333           | 1744.754 | 1466.287                         | 1473.715 | 1362.945            | 1370.366 |

We used Log-logistic, Weibull and Log-normal to fit the OS and PFS curves in our analysis. Abbreviation: OS=Overall survival; PFS= Progression-free survival; AIC= Akaike information criterion; BIC= Bayesian information criterion.
